# Supplementary material for: A Machine Learning Approach to Predicting Academic Performance in Pennsylvania’s Schools
Source: MDPI journal article supplement (doi:10.3390/socsci12030118), 2023-02-24
Supplement: s1 [file s1]

## **A machine learning approach to predicting academic performance in Pennsylvania's schools**

Shan Chen <sup>1</sup>, Yuanzhao Ding <sup>2,\*</sup>

<sup>1</sup> Department of Applied Social Sciences, The Hong Kong Polytechnic University, 11 Yuk Choi Rd, Hung Hom, Hong Kong, China; chenshan1893@gmail.com

<sup>2</sup> School of Geography and the Environment, University of Oxford, South Parks Road, Oxford OX1 3QY, UK

\*Correspondence: armstrongding85@gmail.com

**Table S1. Coding for machine learning and data analysis (Python)**

```
import numpy as np
import pandas as pd
import matplotlib.pyplot as plt
import seaborn as sns
import warnings
warnings.filterwarnings('ignore')

data = pd.read_csv('2018PSSAEXAMPROCESSED50000TOTALAPPRO.csv')
data.head(5)

sns.set(font_scale=2)

plt.hist(x = data.PercentAdvanced, bins = 10, color = 'green')
plt.title('PercentAdvanced')
plt.xlabel('Score')
plt.ylabel('Number')
plt.show()

plt.hist(x = data.PercentBelowBasic, bins = 10, color = 'red')
plt.title('PercentPercentBelowBasic')
plt.xlabel('Score')
plt.ylabel('Number')
plt.show()

colors = iter(['Uncertain:red purple'])

with sns.axes_style('white'):
    g = sns.factorplot("PercentAdvanced", data=data, aspect=2,
                      kind="count", color='steelblue')
    g.set_xticklabels(step=5)

with sns.axes_style('white'):
    g = sns.factorplot("PercentBelowBasic", data=data, aspect=2,
                      kind="count", color='steelblue')
    g.set_xticklabels(step=5)

sns.pairplot(data = data , hue = 'Population', vars = ['PercentAdvanced'],
             palette='Set2',size=10)

sns.pairplot(data = data , hue = 'DensityAppro',vars = ['PercentAdvanced'],
             palette='Set2',size=10)

sns.pairplot(data = data , hue = 'TotalOffences',vars = ['PercentAdvanced'],
             palette='Set2',size=10)

sns.pairplot(data = data , hue = 'CrimeRateAppro',vars = ['PercentAdvanced'],
             palette='Set2',size=10)
```

```

sns.pairplot(data = data , hue = 'GroupAppro',vars = ['PercentAdvanced'],
palette='Set2',size=10)

sns.pairplot(data = data , hue = 'Rural0Urban1', vars = ['PercentAdvanced'],
palette='Set1',size=10)

sns.pairplot(data = data , hue = 'Population', vars = ['PercentBelowBasic'],
palette='Set2',size=10)

sns.pairplot(data = data , hue = 'DensityAppro', vars = ['PercentBelowBasic'],
palette='Set2',size=10)

sns.pairplot(data = data , hue = 'TotalOffences', vars = ['PercentBelowBasic'],
palette='Set2',size=10)

sns.pairplot(data = data , hue = 'CrimeRateAppro', vars = ['PercentBelowBasic'],
palette='Set2',size=10)

sns.pairplot(data = data , hue = 'GroupAppro', vars = ['PercentBelowBasic'],
palette='Set2',size=10)

sns.pairplot(data = data , hue = 'Rural0Urban1', vars = ['PercentBelowBasic'],
palette='Set1',size=10)

df = data.copy()
df.head()

x = data.iloc[:,0:10]
y = data.iloc[:,10]
print(x.shape)
print(y.shape)
print(x.columns)

df = data.copy()
df.head()

plt.figure(figsize = (15,12), dpi = 600)
sns.set(font_scale=1.2)
sns.heatmap(data.corr(),annot = True, cmap='Blues')

plt.figure(figsize=(15, 8))
sns.distplot(df.PercentAdvanced)
plt.ylabel('Frequency', fontsize=15)
plt.xlabel('PercenAdvanced', fontsize=15)
plt.title('PercenAdvancedDistribution', fontsize=15)
plt.show()

x = pd.get_dummies(x)
x.head()

from sklearn.model_selection import train_test_split

```

```
x_train, x_test, y_train, y_test = train_test_split(x, y, test_size = 0.24, shuffle=False)
print(x_train.shape)
print(y_train.shape)
print(x_test.shape)
print(y_test.shape)
print(y_test)
```

```
from sklearn.preprocessing import StandardScaler
sc = StandardScaler()
x_train = sc.fit_transform(x_train)
x_test = sc.fit_transform(x_test)
x_train = pd.DataFrame(x_train)
x_train.head()
print(x_train)
```

```
from sklearn.tree import DecisionTreeClassifier
from sklearn.metrics import confusion_matrix
model = DecisionTreeClassifier()
model.fit(x_train, y_train)
y_pred = model.predict(x_test)
print("Training Accuracy :", model.score(x_train, y_train))
print("Testing Accuaracy :", model.score(x_test, y_test))
cm = confusion_matrix(y_test, y_pred)
np.set_printoptions(threshold=50000)
pd.set_option('max_colwidth',1)
print(cm)
print(y_pred)
```

```
from sklearn.ensemble import RandomForestClassifier
model = RandomForestClassifier()
model.fit(x_train, y_train)
y_pred = model.predict(x_test)
print("Training Accuracy :", model.score(x_train, y_train))
print("Testing Accuracy :", model.score(x_test, y_test))
cm = confusion_matrix(y_test, y_pred)
np.set_printoptions(threshold=50000)
pd.set_option('max_colwidth',1)
print(cm)
print(y_pred)
```

```
from sklearn.model_selection import cross_val_score
cvs = cross_val_score(estimator = model, X = x_train, y = y_train, cv = 10)
print(cvs)
print(y_pred)
```

```
print("Mean Accuracy :", cvs.mean())
print("Variance :", cvs.std())
```

```
from sklearn.linear_model import LogisticRegression
model = LogisticRegression()
model.fit(x_train, y_train)
```

```

y_pred = model.predict(x_test)
print("Training Accuracy :", model.score(x_train, y_train))
print("Testing Accuracy :", model.score(x_test, y_test))
cm = confusion_matrix(y_test, y_pred)
np.set_printoptions(threshold=50000)
pd.set_option('max_colwidth',1)
print(cm)
print(y_pred)

```

```

from sklearn.svm import SVC
model = SVC()
model.fit(x_train, y_train)
y_pred = model.predict(x_test)
print("Training Accuracy :", model.score(x_train, y_train))
print("Testing Accuracy :", model.score(x_test, y_test))
cm = confusion_matrix(y_test, y_pred)
np.set_printoptions(threshold=50000)
pd.set_option('max_colwidth',1)
print(cm)
print(y_pred)

```

```

from sklearn.neural_network import MLPClassifier
model = MLPClassifier(hidden_layer_sizes = (100, 100), activation='relu',
                      solver='adam', max_iter = 50)
model.fit(x_train, y_train)
y_pred = model.predict(x_test)
print("Training Accuracy :", model.score(x_train, y_train))
print("Testing Accuracy :", model.score(x_test, y_test))
cm = confusion_matrix(y_test, y_pred)
np.set_printoptions(threshold=50000, linewidth=1)
pd.set_option('max_colwidth',1)
print(cm)
print(y_pred)

```

**Table S2. Coding for feature importance (Python)**

```
import pandas as pd
import numpy as np
import subprocess

df = pd.read_csv("2018PSSAEXAMPROCESSED50000APPRO.csv", index_col=0)
ncol = len(df.axes[1])
nrow=len(df.axes[0])
print("%s x %s" % (nrow, ncol)) #check dimension
print (df.dtypes) #check data types

df.groupby('PercentAdvanced').count()

n = ncol
for i in range(0,n):
    if (df.iloc[:,i].dtype==object):
        A= df.iloc[:,i].unique()
        map_to_int = {name: n for n, name in enumerate(A)}
        df.iloc[:,i] = df.iloc[:,i].replace(map_to_int)
print (df.dtypes)

df1=df.iloc[:,0:n]
features = list(df1.columns[::(n-2)])
print("* features:", features, sep="\n")
df1.rename(columns={'y':'Target'}, inplace=True)

y = df1["PercentAdvanced"]
X = df1[features]

%matplotlib

import matplotlib.pyplot as plt

fig = plt.figure(figsize=(20, 20))

df1.hist(bins=20)
plt.show()

corr_df = df1.corr()

%matplotlib inline
import seaborn
import matplotlib.pyplot as plt
print(" CorrelationMatrix")
```

```
mask = np.zeros_like(corr_df)
mask[np.triu_indices_from(mask)] = True
seaborn.heatmap(corr_df, cmap='RdYlGn_r', vmax=1.0, vmin=-1, mask = mask,
linewidths=3,fmt='.1f')
```

```
plt.yticks(rotation=0,fontsize=10)
plt.xticks(rotation=90,fontsize=10)
plt.show()
```

```
print(__doc__)
import numpy as np
from time import time
from operator import itemgetter
from scipy.stats import randint as sp_randint
```

```
from sklearn.model_selection import GridSearchCV, RandomizedSearchCV
from sklearn.datasets import load_digits
from sklearn.ensemble import RandomForestClassifier
```

```
clf = RandomForestClassifier(n_estimators=20)
```

```
def report(grid_scores, n_top=3):
    top_scores = sorted(grid_scores, key=itemgetter(1), reverse=True)[:n_top]
    for i, score in enumerate(top_scores):
        print("Model with rank: {0}".format(i + 1))
        print("Mean validation score: {0:.3f} (std: {1:.3f})".format(
            score.mean_validation_score,
            np.std(score.cv_validation_scores)))
        print("Parameters: {0}".format(score.parameters))
        print("")
```

```
param_dist = {"max_depth": [3, None],
              "max_features": sp_randint(1, 11),
              "min_samples_split": sp_randint(1, 11),
              "min_samples_leaf": sp_randint(1, 11),
              "bootstrap": [True, False],
              "criterion": ["gini", "entropy"]}
```

```
n_iter_search = 20
random_search = RandomizedSearchCV(clf, param_distributions=param_dist,
                                   n_iter=n_iter_search)
```

```
start = time()
random_search.fit(X, y)
print("RandomizedSearchCV took %.2f seconds for %d candidates"
```

```

    " parameter settings." % ((time() - start), n_iter_search))
pd.DataFrame(random_search.cv_results_)

from sklearn.ensemble import RandomForestClassifier
clf = RandomForestClassifier(criterion='entropy', max_features=3, bootstrap= False,
min_samples_split=3,
                           max_depth=None, min_samples_leaf=10)

forest=clf.fit(X, y)

features_name = np.array(X.columns.values)
features_name

importances = clf.feature_importances_
std = np.std([clf.feature_importances_ for tree in clf.estimators_],
             axis=0)
indices = np.argsort(importances)[::-1]
print("Feature ranking:")

for f in range(X.shape[1]):
    print("%d. feature %d (%f)" % (f + 1, indices[f], importances[indices[f]]))

plt.figure()
plt.title("Feature importance",size=20)
plt.bar(range(X.shape[1]), importances[indices],
        yerr=std[indices], color='g' , align="center")
plt.xticks(range(X.shape[1]), features_name[indices],rotation=90,fontsize = 20)
plt.yticks(fontsize = 20)
plt.xlim([-1, X.shape[1]])
plt.show()

```



**Table S3. Coding for PA heatmap (R, Population, \*10'000)**

```
library(tidyverse)
library(readr)
library(maps)
LicenseListWithSecondaries <-
read_csv("C:/Users/DING0/Downloads/20220724PopulationPA.csv")

License_final <- LicenseListWithSecondaries %>%
  filter(Status == 'Active') %>%
  mutate(County_join = tolower(str_remove_all(County, " County"))) %>%
  group_by(County_join) %>% summarise(Frequencies = n())

#m <- map("county", "Pennsylvania")

Pennsylvania <- map_data("county", "Pennsylvania")

Pennsylvania_final <- inner_join(Pennsylvania, License_final, by=c('subregion' =
'County_join'))

pen_base <- ggplot(data = Pennsylvania_final, mapping = aes(x = long, y = lat, group =
subregion)) +
  coord_fixed(1.3) +
  geom_polygon(color = "black", fill = "gray")

ditch_the_axes <- theme(
  axis.text = element_blank(),
  axis.line = element_blank(),
  axis.ticks = element_blank(),
  panel.border = element_blank(),
  panel.grid = element_blank(),
  axis.title = element_blank()
)

pen_base +
  geom_polygon(aes(fill = Frequencies), color = "white") +
  geom_polygon(color = "black", fill = NA) +
  theme_bw() +
  ditch_the_axes +
  scale_fill_gradientn(colours = rev(terrain.colors (14)),
    breaks = c(32, 64, 128))
```

**Table S4. Coding for PA heatmap (R, Total Offences, \*1000)**

```
library(tidyverse)
library(readr)
library(maps)
LicenseListWithSecondaries <-
read_csv("C:/Users/DING0/Downloads/20220724TotalOffencesPA.csv")

License_final <- LicenseListWithSecondaries %>%
  filter(Status == 'Active') %>%
  mutate(County_join = tolower(str_remove_all(County, " County"))) %>%
  group_by(County_join) %>% summarise(Frequencies = n())

#m <- map("county", "Pennsylvania")

Pennsylvania <- map_data("county", "Pennsylvania")

Pennsylvania_final <- inner_join(Pennsylvania, License_final, by=c('subregion' =
'County_join'))

pen_base <- ggplot(data = Pennsylvania_final, mapping = aes(x = long, y = lat, group =
subregion)) +
  coord_fixed(1.3) +
  geom_polygon(color = "black", fill = "gray")

ditch_the_axes <- theme(
  axis.text = element_blank(),
  axis.line = element_blank(),
  axis.ticks = element_blank(),
  panel.border = element_blank(),
  panel.grid = element_blank(),
  axis.title = element_blank()
)

pen_base +
  geom_polygon(aes(fill = Frequencies), color = "white") +
  geom_polygon(color = "black", fill = NA) +
  theme_bw() +
  ditch_the_axes +
  scale_fill_gradientn(colours = rev(terrain.colors (14)),
    breaks = c(128, 256, 512))
```

**Table S5. Coding for PA heatmap (R, Real)**

```
library(tidyverse)
library(readr)
library(maps)
LicenseListWithSecondaries <-
read_csv("C:/Users/DING0/Downloads/20220724ObservationPAAAdvanced.csv")

License_final <- LicenseListWithSecondaries %>%
  filter(Status == 'Active') %>%
  mutate(County_join = tolower(str_remove_all(County, " County"))) %>%
  group_by(County_join) %>% summarise(Frequencies = n())

#m <- map("county", "Pennsylvania")

Pennsylvania <- map_data("county", "Pennsylvania")

Pennsylvania_final <- inner_join(Pennsylvania, License_final, by=c('subregion' =
'County_join'))

pen_base <- ggplot(data = Pennsylvania_final, mapping = aes(x = long, y = lat, group =
subregion)) +
  coord_fixed(1.3) +
  geom_polygon(color = "black", fill = "gray")

ditch_the_axes <- theme(
  axis.text = element_blank(),
  axis.line = element_blank(),
  axis.ticks = element_blank(),
  panel.border = element_blank(),
  panel.grid = element_blank(),
  axis.title = element_blank()
)

pen_base +
  geom_polygon(aes(fill = Frequencies), color = "white") +
  geom_polygon(color = "black", fill = NA) +
  theme_bw() +
  ditch_the_axes +
  scale_fill_gradientn(colours = heat.colors (14),
    breaks = c(8, 12, 16),
    trans = "log2")
```

**Table S6. Coding for PA heatmap (R, Prediction)**

```
library(tidyverse)
library(readr)
library(maps)
LicenseListWithSecondaries <-
read_csv("C:/Users/DING0/Downloads/20220724PredictionPAAdvanced.csv")

License_final <- LicenseListWithSecondaries %>%
  filter(Status == 'Active') %>%
  mutate(County_join = tolower(str_remove_all(County, " County"))) %>%
  group_by(County_join) %>% summarise(Frequencies = n())

#m <- map("county", "Pennsylvania")

Pennsylvania <- map_data("county", "Pennsylvania")

Pennsylvania_final <- inner_join(Pennsylvania, License_final, by=c('subregion' =
'County_join'))

pen_base <- ggplot(data = Pennsylvania_final, mapping = aes(x = long, y = lat, group =
subregion)) +
  coord_fixed(1.3) +
  geom_polygon(color = "black", fill = "gray")

ditch_the_axes <- theme(
  axis.text = element_blank(),
  axis.line = element_blank(),
  axis.ticks = element_blank(),
  panel.border = element_blank(),
  panel.grid = element_blank(),
  axis.title = element_blank()
)

pen_base +
  geom_polygon(aes(fill = Frequencies), color = "white") +
  geom_polygon(color = "black", fill = NA) +
  theme_bw() +
  ditch_the_axes +
  scale_fill_gradientn(colours = heat.colors (14),
    breaks = c(8, 12, 16),
    trans = "log2")
```

**Table S7. Coding for PA heatmap (R, CrimeRate)**

```
library(tidyverse)
library(readr)
library(maps)
LicenseListWithSecondaries <-
read_csv("C:/Users/DING0/Downloads/20220724CrimeRate.csv")

License_final <- LicenseListWithSecondaries %>%
  filter(Status == 'Active') %>%
  mutate(County_join = tolower(str_remove_all(County, " County"))) %>%
  group_by(County_join) %>% summarise(Frequencies = n())

#m <- map("county", "Pennsylvania")

Pennsylvania <- map_data("county", "Pennsylvania")

Pennsylvania_final <- inner_join(Pennsylvania, License_final, by=c('subregion' =
'County_join'))

pen_base <- ggplot(data = Pennsylvania_final, mapping = aes(x = long, y = lat, group =
subregion)) +
  coord_fixed(1.3) +
  geom_polygon(color = "black", fill = "gray")

ditch_the_axes <- theme(
  axis.text = element_blank(),
  axis.line = element_blank(),
  axis.ticks = element_blank(),
  panel.border = element_blank(),
  panel.grid = element_blank(),
  axis.title = element_blank()
)

pen_base +
  geom_polygon(aes(fill = Frequencies), color = "white") +
  geom_polygon(color = "black", fill = NA) +
  theme_bw() +
  ditch_the_axes +
  scale_fill_gradientn(colours = rev(terrain.colors (14)),
    breaks = c(9, 15, 21))
```

**Table S8 Tuning results by random search**

| param_bootstrap | param_criterion | param_max_depth | param_max_features | param_min_samples_leaf | param_min_samples_split | mean_test_score | std_test_score | rank_test_score |
|-----------------|-----------------|-----------------|--------------------|------------------------|-------------------------|-----------------|----------------|-----------------|
| False           | entropy         | 3               | 2                  | 3                      | 8                       | 0.114589        | 0.000828       | 1               |
| True            | entropy         | 3               | 6                  | 7                      | 6                       | 0.096399        | 0.033763       | 2               |
| True            | entropy         | 3               | 7                  | 10                     | 3                       | 0.094480        | 0.034814       | 3               |
| False           | gini            | 3               | 5                  | 4                      | 9                       | 0.092531        | 0.030232       | 4               |
| False           | gini            | 3               | 7                  | 5                      | 2                       | 0.086420        | 0.032037       | 5               |
| True            | entropy         | None            | 7                  | 6                      | 7                       | 0.043402        | 0.026156       | 6               |
| False           | entropy         | None            | 6                  | 9                      | 8                       | 0.041542        | 0.025095       | 7               |
| True            | gini            | None            | 8                  | 6                      | 7                       | 0.040331        | 0.027743       | 8               |
| True            | entropy         | None            | 6                  | 2                      | 10                      | 0.038589        | 0.025954       | 9               |
| True            | gini            | None            | 2                  | 10                     | 2                       | 0.037734        | 0.018790       | 10              |
| True            | gini            | None            | 4                  | 8                      | 4                       | 0.035726        | 0.026884       | 11              |
| False           | entropy         | None            | 4                  | 5                      | 9                       | 0.035253        | 0.022784       | 12              |
| False           | gini            | None            | 1                  | 10                     | 6                       | 0.034574        | 0.019973       | 13              |
| False           | gini            | None            | 1                  | 7                      | 9                       | 0.030411        | 0.019482       | 14              |
| True            | entropy         | None            | 1                  | 2                      | 9                       | 0.029644        | 0.013548       | 15              |
| True            | entropy         | 3               | 2                  | 7                      | 1                       | NaN             | NaN            | 16              |
| False           | gini            | 3               | 10                 | 1                      | 6                       | NaN             | NaN            | 17              |
| False           | entropy         | None            | 9                  | 8                      | 10                      | NaN             | NaN            | 18              |
| False           | gini            | None            | 7                  | 9                      | 1                       | NaN             | NaN            | 19              |
| True            | gini            | None            | 9                  | 8                      | 5                       | NaN             | NaN            | 20              |

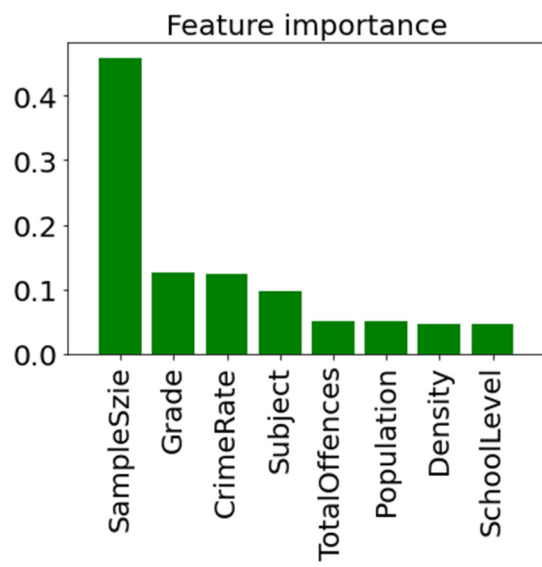

**Figure S1. The feature importance of the factors**

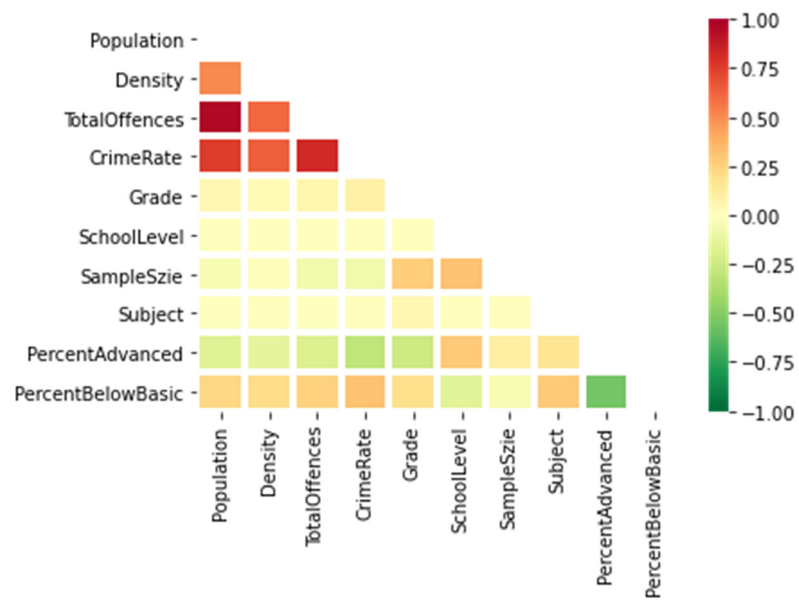

**Figure S2. The correlation matrix of the samples**
